# Supplementary material for: Limiting systemic endocrine overtreatment in postmenopausal breast cancer patients with an ultralow classification of the 70-gene signature
Source: Springer Nature journal article supplement (doi:10.1007/s10549-022-06618-z), 2022-05-19
Supplement: MOESM1 [file 21199974]

A

## Node negative without censoring 2nd primair

Mammprint ■ ultralow ■ low risk ■ high risk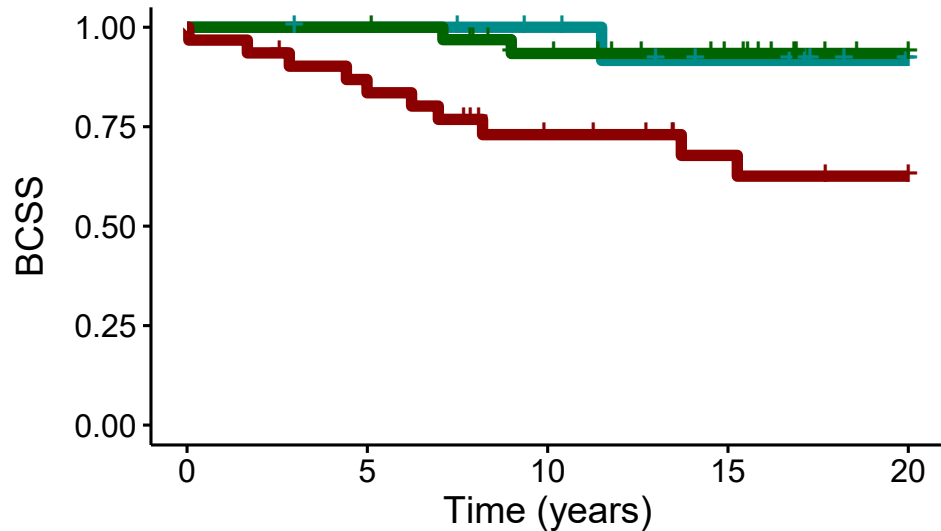

Number at risk

|                                      |    |    |    |    |    |
|--------------------------------------|----|----|----|----|----|
| <span style="color: cyan;">■</span>  | 16 | 15 | 13 | 9  | 4  |
| <span style="color: green;">■</span> | 33 | 33 | 26 | 20 | 12 |
| <span style="color: red;">■</span>   | 31 | 25 | 18 | 13 | 11 |

B

## Node positive without censoring 2nd primair

Mammprint ■ ultralow ■ low risk ■ high risk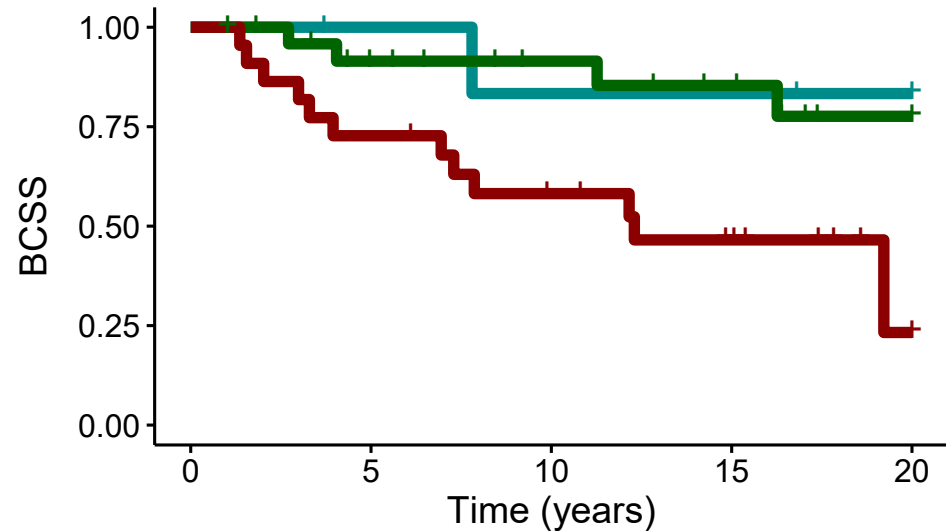

Number at risk

|                                      |    |    |    |    |   |
|--------------------------------------|----|----|----|----|---|
| <span style="color: cyan;">■</span>  | 7  | 6  | 5  | 5  | 4 |
| <span style="color: green;">■</span> | 26 | 19 | 15 | 12 | 7 |
| <span style="color: red;">■</span>   | 22 | 16 | 11 | 7  | 1 |
